# Supplementary material
Source: publisher figshare collection journal article supplement (https://geolsoc.figshare.com/ndownloader/files/28913017)
Supplement: Supplementary file 1 [file 28913017]

#The palaeolatitudinal distribution of Ediacaran macrobiota statistical tests

library(MASS)
Overall <- read.csv("Overall.csv", row.names=1)
View(Overall)
Temporal <- read.csv("Temporal.csv", row.names=1)
View(Temporal)
OverallMER <- read.csv("OverallMER.csv", row.names=1)
View(OverallMER)
ChiMER <- read.csv("ChiMER.csv", row.names=1)
View(ChiMER)
OverallSCO <- read.csv("OverallSCO.csv", row.names=1)
View(OverallSCO)
ChiSCO <- read.csv("ChiSCO.csv", row.names=1)
View(ChiSCO)


#Tests for patterns through time

Time = data.frame(Overall$Taxa, Overall$Localities)
print(Time)
print(kruskal.test(Time))


#Tests for patterns through time - MER20

LowMER = data.frame(Temporal$Low_TaxaMER, Temporal$Low_LocalitiesMER)
print(LowMER)
print(kruskal.test(LowMER))

HighMER = data.frame(Temporal$High_TaxaMER, Temporal$High_LocalitiesMER)
print(HighMER)
print(kruskal.test(HighMER))

TaxaMER = data.frame(Temporal$Low_TaxaMER, Temporal$High_TaxaMER)
print(TaxaMER)
print(kruskal.test(TaxaMER))

LocalitiesMER = data.frame(Temporal$Low_LocalitiesMER, Temporal$High_LocalitiesMER)
print(LocalitiesMER)
print(kruskal.test(LocalitiesMER))


#Tests for patterns through time - SCO01

LowSCO = data.frame(Temporal$Low_TaxaSCO, Temporal$Low_LocalitiesSCO)
print(LowSCO)
print(kruskal.test(LowSCO))

HighSCO = data.frame(Temporal$High_TaxaSCO, Temporal$High_LocalitiesSCO)
print(HighSCO)
print(kruskal.test(HighSCO))

TaxaSCO = data.frame(Temporal$Low_TaxaSCO, Temporal$High_TaxaSCO)
print(TaxaSCO)
print(kruskal.test(TaxaSCO))

LocalitiesSCO = data.frame(Temporal$Low_LocalitiesSCO, Temporal$High_LocalitiesSCO)
print(LocalitiesSCO)
print(kruskal.test(LocalitiesSCO))


#Tests for latitudinal patterns - MER20

OverallMER = data.frame(OverallMER$Total_Taxa, OverallMER$Localities)
print(OverallMER)
print(kruskal.test(OverallMER))


AlgalMER = data.frame(ChiMER$Algal, ChiMER$Non_Algal)
print(AlgalMER)
print(chisq.test(AlgalMER))

BilateralMER = data.frame(ChiMER$Bilateral, ChiMER$Non_Bilateral)
print(BilateralMER)
print(chisq.test(BilateralMER))

FrondomorphMER = data.frame(ChiMER$Frondomorph, ChiMER$Non_Frondomorph)
print(FrondomorphMER)
print(chisq.test(FrondomorphMER))

TubularMER = data.frame(ChiMER$Tubular, ChiMER$Non_Tubular)
print(TubularMER)
print(chisq.test(TubularMER))

MiscellaneousMER = data.frame(ChiMER$Miscellaneous, ChiMER$Non_Miscellaneous)
print(MiscellaneousMER)
print(chisq.test(MiscellaneousMER))

BioOrgMER = data.frame(ChiMER$Biomineralising_Organic_template, ChiMER$Non_Bio_Org)
print(BioOrgMER)
print(chisq.test(BioOrgMER))

SoftMER = data.frame(ChiMER$Soft_body, ChiMER$Non_Soft_body)
print(SoftMER)
print(chisq.test(SoftMER))


# Tests for latitudinal patterns - SCO01

OverallSCO = data.frame(OverallSCO$Total_Taxa, OverallSCO$Localities)
print(OverallSCO)
print(kruskal.test(OverallSCO))


AlgalSCO = data.frame(ChiSCO$Algal, ChiSCO$Non_Algal)
print(AlgalSCO)
print(chisq.test(AlgalSCO))

BilateralSCO = data.frame(ChiSCO$Bilateral, ChiSCO$Non_Bilateral)
print(BilateralSCO)
print(chisq.test(BilateralSCO))

RadialSCO = data.frame(ChiSCO$Radial, ChiSCO$Non_Radial)
print(RadialSCO)
print(chisq.test(RadialSCO))

FrondomorphSCO = data.frame(ChiSCO$Frondomorph, ChiSCO$Non_Frondomorph)
print(FrondomorphSCO)
print(chisq.test(FrondomorphSCO))

TubularSCO = data.frame(ChiSCO$Tubular, ChiSCO$Non_Tubular)
print(TubularSCO)
print(chisq.test(TubularSCO))

MiscellaneousSCO = data.frame(ChiSCO$Miscellaneous, ChiSCO$Non_Miscellaneous)
print(MiscellaneousSCO)
print(chisq.test(MiscellaneousSCO))

BioOrgSCO = data.frame(ChiSCO$Biomineralising_Organic_template, ChiSCO$Non_Bio_Org)
print(BioOrgSCO)
print(chisq.test(BioOrgSCO))

SoftSCO = data.frame(ChiSCO$Soft_body, ChiSCO$Non_Soft_body)
print(SoftSCO)
print(chisq.test(SoftSCO))
